# Supplementary material for: CD69 and SBK1 as potential predictors of responses to PD-1/PD-L1 blockade cancer immunotherapy in lung cancer and melanoma
Source: Front Immunol. 2022 Aug 15;13:952059. doi: 10.3389/fimmu.2022.952059 (PMC9421049; doi:10.3389/fimmu.2022.952059)
Supplement: Supplementary Table 1 — Detailed list of DEGs in responders versus non- responders. [file Table_1.xlsx]

## Sheet: Sheet1
Lung cancer					Melanoma
Gene Symbol	Entrez Gene ID	LogFC	LogFC-P value	LogFC-Adjusted P value	Gene Symbol	Entrez Gene ID	LogFC	LogFC-P value	LogFC-Adjusted P value
CCL8	6355	-3.58	8.67e-11	1.97e-06	BLK	640	-4.02	8.59e-17	1.41e-12
LRP2	4036	4.92	3.4e-10	3.86e-06	ABAT	18	-2.32	9.69e-14	7.96e-10
NPY1R	4886	4.18	1.81e-08	0.000137	FDCSP	260436	-3.92	1.45e-12	7.95e-09
CCL3	6348	-2.76	5.79e-08	0.000169	PAX5	5079	-3.35	2.42e-12	9.96e-09
CLC	1178	-4.57	7.38e-08	0.000169	TLR10	81793	-2.56	2.86e-11	7.84e-08
DUSP13	51207	-4.83	5.15e-08	0.000169	CR2	1380	-3.35	2.68e-10	5.5e-07
GFI1	2672	-2.17	6.1e-08	0.000169	SPIB	6689	-2.81	2.67e-10	5.5e-07
HCST	10870	-2.38	7.09e-08	0.000169	CRHBP	1393	-2.17	7.98e-10	1.46e-06
KLRC3	3823	-3.41	7.44e-08	0.000169	PDE4C	5143	2.49	1.5e-09	2.47e-06
VIL1	7429	5.12	7.26e-08	0.000169	RN7SK	125050	2.94	3.62e-09	5.41e-06
ALOX5AP	241	-2.47	1.44e-07	0.000209	MEG3	55384	2.44	7.07e-09	9.67e-06
AQP4	361	4.74	1.66e-07	0.000209	ACSM5	54988	-1.86	9.94e-09	1.23e-05
BCL2A1	597	-3.31	1.24e-07	0.000209	NIPAL1	152519	-2.03	1.04e-08	1.23e-05
CCNG2	901	-1.02	1.18e-07	0.000209	C4A	720	-2.01	1.12e-08	1.23e-05
CHAT	1103	7.15	1.16e-07	0.000209	CPS1	1373	-2.33	1.73e-08	1.78e-05
CLEC4A	50856	-2.24	1.61e-07	0.000209	DTX1	1840	-2.03	3.17e-08	3.06e-05
MSR1	4481	-2.09	1.42e-07	0.000209	GATM	2628	-1.74	5.67e-08	5.18e-05
NKG7	4818	-2.69	1.58e-07	0.000209	TNFRSF13C	115650	-1.95	6.6e-08	5.71e-05
CD300A	11314	-2.2	1.75e-07	0.00021	P2RX5	5026	-2.25	7.6e-08	6.25e-05
MCEMP1	199675	-3.54	1.87e-07	0.000212	CD22	933	-2.21	8.42e-08	6.59e-05
KIF1A	547	4.71	1.99e-07	0.000215	KHK	3795	-1.52	8.96e-08	6.69e-05
CST7	8530	-2.53	2.25e-07	0.000218	CYP19A1	1588	2.07	1.3e-07	9.25e-05
KLRD1	3824	-2.28	2.23e-07	0.000218	AGT	183	-2.6	1.86e-07	0.000127
PLIN2	123	-2.43	2.3e-07	0.000218	MS4A1	931	-2.56	2.04e-07	0.000134
CCL3L3	414062	-2.91	2.46e-07	0.000223	LTB	4050	-2.17	2.83e-07	0.000172
PNRC1	10957	-1.22	3.08e-07	0.000269	CCL21	6366	-2.84	3.19e-07	0.000187
CXCR4	7852	-2.2	3.95e-07	0.00031	FAM177B	400823	-2.18	3.43e-07	0.00019
NCF2	4688	-2.22	3.84e-07	0.00031	SLC26A4	5172	-1.6	3.47e-07	0.00019
RIMBP2	23504	3.86	3.96e-07	0.00031	FCER2	2208	-2.43	3.96e-07	0.00021
FREM2	341640	3.61	4.11e-07	0.000311	EFHD1	80303	1.95	4.17e-07	0.000214
SLC2A3	6515	-2.52	4.65e-07	0.000341	PSCA	8000	2.07	4.46e-07	0.000222
NOTUM	147111	3.86	4.81e-07	0.000341	LRG1	116844	-1.89	5.32e-07	0.000257
EVI2A	2123	-2.13	5.28e-07	0.000363	BACH2	60468	-1.28	5.57e-07	0.000261
EFR3B	22979	2.44	5.74e-07	0.000383	HBA2	3040	2.41	6e-07	0.000274
FFAR2	2867	-2.91	6.44e-07	0.000385	CARD11	84433	-1.76	6.54e-07	0.000286
FLG	2312	3.92	6.34e-07	0.000385	LAMC3	10319	1.59	6.62e-07	0.000286
SFTPA2	729238	5.35	6.4e-07	0.000385	GCSAM	257144	-1.98	7.01e-07	0.000293
CEACAM3	1084	-2.89	7.19e-07	0.000413	HSD11B1	3290	-1.93	7.14e-07	0.000293
SNX10	29887	-1.66	7.28e-07	0.000413	TYRP1	7306	2.91	7.51e-07	0.000301
B3GALT5	10317	3.73	7.71e-07	0.000427	UCHL1	7345	2.36	7.83e-07	0.000306
CD68	968	-1.68	8.9e-07	0.000459	GAPT	202309	-1.74	8.97e-07	0.000343
CD8A	925	-2.08	8.55e-07	0.000459	SCG2	7857	-1.82	9.31e-07	0.000348
HOXD1	3231	2.54	8.73e-07	0.000459	C4B	721	-1.86	9.56e-07	0.000349
CCL13	6357	-3.2	1.11e-06	0.000548	HAMP	57817	-1.95	1.01e-06	0.000361
IGKV2D-40	28878	-4	1.13e-06	0.000548	ST6GAL1	6480	-1.22	1.11e-06	0.000388
KANK4	163782	3.39	1.1e-06	0.000548	MAT1A	4143	-2.43	1.2e-06	0.000411
PRF1	5551	-2.32	1.19e-06	0.000563	CLU	1191	-2.17	1.27e-06	0.000425
CTSW	1521	-2.34	1.3e-06	0.000603	MIR503HG	84848	1.38	1.52e-06	0.000488
LAMA1	284217	3.06	1.4e-06	0.000621	BLNK	29760	-1.55	1.58e-06	0.000496
MINPP1	9562	-1.02	1.45e-06	0.000633	IRF6	3664	-2.37	1.6e-06	0.000496
CCL4L1	388372	-2.46	1.53e-06	0.000651	WDFY4	57705	-1.57	1.96e-06	0.000595
NEFL	4747	4.65	1.55e-06	0.000651	GP1BA	2811	-2.03	2.11e-06	0.000631
HOXB8	3218	4.34	1.65e-06	0.00068	MYO7B	4648	-1.98	2.54e-06	0.000722
CRTAM	56253	-1.97	1.71e-06	0.000687	TDO2	6999	-1.77	2.55e-06	0.000722
SLC39A2	29986	3.93	1.73e-06	0.000687	TMEM154	201799	-1.59	2.94e-06	0.000817
GPC5	2262	3.19	1.82e-06	0.000701	HSD17B6	8630	-1.45	3.12e-06	0.000842
SRGN	5552	-2.51	1.8e-06	0.000701	PRRG4	79056	-1.46	3.09e-06	0.000842
CD300LF	146722	-1.97	2e-06	0.000706	VIPR1	7433	-1.95	3.37e-06	0.000894
FCGR2B	2213	-2.53	1.89e-06	0.000706	CYP39A1	51302	-1.45	3.74e-06	0.000974
FCGR3A	2214	-2.11	2.02e-06	0.000706	CHI3L2	1117	-1.98	4.1e-06	0.00105
GLMP	112770	-1.04	1.9e-06	0.000706	RNF128	79589	-2.04	4.14e-06	0.00105
LCP2	3937	-2.07	1.97e-06	0.000706	ITIH5	80760	1.98	4.78e-06	0.00119
PCSK9	255738	2.96	1.95e-06	0.000706	SNORA73B	26768	1.91	5.52e-06	0.00132
MMP25	64386	-2.5	2.08e-06	0.000714	LIPH	200879	-2.46	5.69e-06	0.00133
CCL7	6354	-3.6	2.27e-06	0.000746	PLA2G2D	26279	-2.14	5.99e-06	0.00139
GRM2	2912	1.84	2.23e-06	0.000746	CCDC8	83987	1.42	6.68e-06	0.00146
CD8B	926	-2.03	2.35e-06	0.000759	MXRA8	54587	1.48	6.46e-06	0.00146
LHX9	56956	3.83	2.37e-06	0.000759	RTTN	25914	1.15	6.63e-06	0.00146
ASTN1	460	3.6	2.55e-06	0.000794	SYT7	9066	-1.51	6.66e-06	0.00146
DAB1	1600	2.88	2.55e-06	0.000794	RAMP1	10267	1.86	7.59e-06	0.00164
TNFSF13B	10673	-1.82	2.6e-06	0.000796	GPR18	2841	-1.84	8.54e-06	0.0018
HLA-C	3107	-1.38	2.87e-06	0.000856	DPP4	1803	1.76	9.26e-06	0.00193
PTPN22	26191	-2.03	2.85e-06	0.000856	FCRL3	115352	-1.93	9.4e-06	0.00193
FSTL4	23105	3.06	2.99e-06	0.000881	P2RY8	286530	-1.37	9.61e-06	0.00195
CD80	941	-1.86	3.05e-06	0.000887	DDIT4L	115265	1.4	9.78e-06	0.00196
PDCD1LG2	80380	-1.83	3.52e-06	0.00101	FUCA1	2517	-1.02	1.01e-05	0.002
C19orf38	255809	-2.3	3.65e-06	0.00102	ANKRD55	79722	-1.52	1.15e-05	0.00224
HOXB9	3219	4.59	3.61e-06	0.00102	PLCB1	23236	-1.05	1.23e-05	0.00236
IL1RL1	9173	-2.94	4.12e-06	0.00111	ADAM12	8038	1.05	1.25e-05	0.00237
MGAT1	4245	-1.18	4.12e-06	0.00111	ALDH1L2	160428	1.33	1.27e-05	0.00237
SBK1	388228	2.04	4.04e-06	0.00111	HES4	57801	1.27	1.36e-05	0.00251
GZMK	3003	-2.24	4.19e-06	0.00112	ASS1	445	-1.88	1.39e-05	0.00253
CXCR2	3579	-2.76	4.48e-06	0.00118	SORCS2	57537	1.62	1.59e-05	0.00287
CCL4	6351	-2.31	4.66e-06	0.00122	CXCL13	10563	-2.04	1.65e-05	0.00294
CMTM2	146225	-2.7	4.81e-06	0.00123	CD69	969	-1.63	1.74e-05	0.00304
SH2D1B	117157	-2.52	4.77e-06	0.00123	LDHD	197257	-1.3	1.78e-05	0.00307
LAIR2	3904	-2.5	4.87e-06	0.00123	NAPSB	256236	-1.62	1.85e-05	0.00317
ITGAD	3681	-2.47	5e-06	0.00125	AGMAT	79814	-1.4	1.89e-05	0.00318
HLA-E	3133	-1.32	5.28e-06	0.0013	BTLA	151888	-1.6	1.93e-05	0.00318
CRLF2	64109	-2.83	5.63e-06	0.00138	HTRA3	94031	1.74	1.92e-05	0.00318
IGSF6	10261	-1.84	5.88e-06	0.00141	NHS	4810	1.41	1.9e-05	0.00318
P2RY13	53829	-1.98	5.86e-06	0.00141	C3	718	-1.72	2.04e-05	0.00333
ADAM8	101	-2.01	6.35e-06	0.00149	ANXA13	312	-1.61	2.08e-05	0.00335
KLRC4	8302	-3.26	6.33e-06	0.00149	FCRL2	79368	-2.2	2.16e-05	0.00342
CCL2	6347	-2.19	6.6e-06	0.00153	POU2F2	5452	-1.49	2.15e-05	0.00342
GZMH	2999	-2.29	6.91e-06	0.00158	HBB	3043	1.98	2.24e-05	0.00348
FLG2	388698	4.48	6.99e-06	0.00159	SP140	11262	-1.5	2.27e-05	0.00349
RGS10	6001	-1.56	7.19e-06	0.00161	COL11A2	1302	1.84	2.32e-05	0.00352
GZMA	3001	-1.92	7.38e-06	0.00164	LINC01232	102725509	-1.03	2.5e-05	0.00374
HAVCR2	84868	-1.88	7.55e-06	0.00166	CETP	1071	-1.61	2.76e-05	0.00408
CTSS	1520	-1.71	7.82e-06	0.00171	PSD4	23550	-1.3	3.18e-05	0.00463
SPP1	6696	-2.13	8.25e-06	0.00178	CD37	951	-1.45	3.41e-05	0.00491
FCGR2A	2212	-1.76	8.42e-06	0.0018	KCNJ13	3769	2.22	3.94e-05	0.00563
GPR84	53831	-2.09	9.05e-06	0.0019	MLXIPL	51085	-1.9	4.05e-05	0.00573
IFNGR1	3459	-1.21	9.47e-06	0.00197	FAM189A2	9413	1.09	4.21e-05	0.00591
LAT2	7462	-1.55	9.6e-06	0.00198	JPH1	56704	1.72	4.25e-05	0.00591
CD53	963	-1.94	9.92e-06	0.00203	SPAG4	6676	1.17	4.31e-05	0.00595
CEBPB	1051	-1.59	1.05e-05	0.00207	STAC2	342667	2.03	4.79e-05	0.0065
DDX60L	91351	-1.6	1.03e-05	0.00207	HLA-DOA	3111	-1.21	4.87e-05	0.00656
FAM214B	80256	-1.22	1.03e-05	0.00207	STC1	6781	1.59	5.09e-05	0.00671
VNN2	8875	-2.43	1.05e-05	0.00207	PTH1R	5745	1.34	5.33e-05	0.00694
GJB2	2706	2.71	1.06e-05	0.00208	MMP2	4313	1.2	5.49e-05	0.00711
SLC39A5	283375	3.48	1.08e-05	0.00208	NELL2	4753	-1.31	5.68e-05	0.00716
ARHGAP40	343578	2.37	1.09e-05	0.00209	RGS5	8490	-1.24	5.64e-05	0.00716
LY96	23643	-1.61	1.13e-05	0.00211	SBK1	388228	-1.3	5.71e-05	0.00716
SLC25A19	60386	-1.15	1.13e-05	0.00211	TTC9	23508	-1.56	5.67e-05	0.00716
TEAD4	7004	1.02	1.15e-05	0.00211	ERRFI1	54206	-1.25	5.89e-05	0.00728
TNFRSF1B	7133	-1.93	1.14e-05	0.00211	PRSS22	64063	2.87	5.89e-05	0.00728
ACP5	54	-1.66	1.24e-05	0.00213	CLECL1	160365	-1.38	6.03e-05	0.00739
BCHE	590	3.04	1.22e-05	0.00213	P2RY10	27334	-1.64	6.12e-05	0.00745
IL18R1	8809	-1.63	1.22e-05	0.00213	PRPH2	5961	1.39	6.75e-05	0.00815
KLRC1	3821	-2.18	1.19e-05	0.00213	GPC1	2817	1.14	6.99e-05	0.00833
LILRA5	353514	-2.57	1.23e-05	0.00213	CD79A	973	-2.08	7.2e-05	0.00851
SLC11A1	6556	-2.2	1.21e-05	0.00213	CYP2J2	1573	-1.78	7.48e-05	0.00867
SNORD116-8	100033420	6.39	1.19e-05	0.00213	LINC00996	285972	-1.58	7.51e-05	0.00867
TFEC	22797	-1.87	1.22e-05	0.00213	S100A8	6279	1.9	7.41e-05	0.00867
TNFSF8	944	-2.02	1.19e-05	0.00213	TESPA1	9840	-1.47	7.55e-05	0.00867
KIR2DL4	3805	-2.5	1.26e-05	0.00215	PPP1R16B	26051	-1.19	7.85e-05	0.00896
FCGR2C	9103	-2.42	1.27e-05	0.00215	CCBE1	147372	1.52	8.04e-05	0.009
MS4A4A	51338	-1.92	1.35e-05	0.00226	IRF8	3394	-1.25	8.28e-05	0.00919
CSF2RA	1438	-2.01	1.42e-05	0.00235	APCDD1L	164284	1.93	8.53e-05	0.0094
GCA	25801	-1.2	1.43e-05	0.00235	CORO1A	11151	-1.36	9.15e-05	0.00996
CCR1	1230	-2.08	1.47e-05	0.00237	PCDHAC2	56134	-1.53	9.11e-05	0.00996
FCGR3B	2215	-2.98	1.47e-05	0.00237
KRT14	3861	4.25	1.47e-05	0.00237
PDE1C	5137	2.25	1.51e-05	0.00241
MNX1	3110	2.44	1.54e-05	0.00244
DSG1	1828	3.98	1.58e-05	0.00244
HLA-DQA1	3117	-2.37	1.55e-05	0.00244
PLD5	200150	3.75	1.56e-05	0.00244
ASAH1	427	-1.17	1.72e-05	0.00261
ITGAX	3687	-2.23	1.72e-05	0.00261
OSM	5008	-2.78	1.71e-05	0.00261
DLX5	1749	3.07	1.74e-05	0.00261
CXCR1	3577	-3.32	1.76e-05	0.00262
TLR4	7099	-1.65	1.78e-05	0.00263
SLITRK2	84631	3.18	1.8e-05	0.00265
IGKV1-9	28941	-3.41	1.84e-05	0.00267
UGT8	7368	2.06	1.89e-05	0.00273
GZMM	3004	-1.87	1.94e-05	0.00279
MCOLN1	57192	-1.17	1.98e-05	0.00281
OASL	8638	-2.17	1.98e-05	0.00281
CXCL8	3576	-2.76	2.01e-05	0.00284
HPSE	10855	-1.44	2.13e-05	0.00298
SIRPB1	10326	-1.68	2.17e-05	0.00302
MAP1LC3C	440738	-2.51	2.19e-05	0.00303
C1QA	712	-1.97	2.24e-05	0.00306
FASLG	356	-1.86	2.23e-05	0.00306
FPR1	2357	-2.37	2.3e-05	0.00312
MUC20	200958	-2.42	2.34e-05	0.00316
SCARNA11	677780	3.88	2.49e-05	0.00335
WSCD2	9671	3.55	2.52e-05	0.00336
MAGEA11	4110	5.3	2.56e-05	0.0034
CCRL2	9034	-2.01	2.72e-05	0.00357
CXCR2P1	3580	-2.89	2.72e-05	0.00357
ANKRD36	375248	2.68	2.81e-05	0.00367
CLEC7A	64581	-1.81	2.83e-05	0.00367
ICAM3	3385	-1.92	2.9e-05	0.00374
HLA-DQB1	3119	-1.89	2.92e-05	0.00374
CD33	945	-1.71	2.93e-05	0.00374
CLEC12A	160364	-2.16	3.04e-05	0.00385
ANO4	121601	2.76	3.08e-05	0.00386
CD96	10225	-1.94	3.06e-05	0.00386
RASGRP4	115727	-1.98	3.09e-05	0.00386
CD244	51744	-1.69	3.16e-05	0.0039
EVI2B	2124	-1.76	3.16e-05	0.0039
CHGB	1114	3.45	3.21e-05	0.00394
FGL2	10875	-1.48	3.36e-05	0.0041
CHMP1B2P	101060146	3.25	3.41e-05	0.00412
ILDR2	387597	2.54	3.49e-05	0.0042
RAB8B	51762	-1.23	3.6e-05	0.00427
CD69	969	-2.45	3.8e-05	0.0044
KRT78	196374	3.36	3.77e-05	0.0044
PILRA	29992	-1.81	3.77e-05	0.0044
PLAUR	5329	-1.86	3.77e-05	0.0044
SFRP1	6422	2.35	3.82e-05	0.0044
TAGAP	117289	-1.81	3.81e-05	0.0044
CTSL	1514	-1.82	3.94e-05	0.00446
FPR2	2358	-2.65	3.97e-05	0.00446
SLC38A11	151258	2.87	3.9e-05	0.00446
MAGI1	9223	1.16	4.01e-05	0.00449
SELL	6402	-2.23	4.09e-05	0.00452
TREM1	54210	-2.58	4.08e-05	0.00452
IL36G	56300	3.03	4.12e-05	0.00454
GLRX	2745	-1.52	4.21e-05	0.0046
RGS18	64407	-1.74	4.31e-05	0.00467
RNASE2	6036	-2.29	4.32e-05	0.00467
STAT4	6775	-1.64	4.41e-05	0.00474
CREM	1390	-1.26	4.5e-05	0.00477
ITGB7	3695	-1.56	4.47e-05	0.00477
KNG1	3827	4.36	4.52e-05	0.00477
PDZD2	23037	1.8	4.5e-05	0.00477
MEFV	4210	-2.4	4.59e-05	0.00482
PRODH	5625	2.66	4.71e-05	0.00493
SPINK5	11005	2.38	4.74e-05	0.00493
GPR65	8477	-1.74	4.79e-05	0.00496
GNLY	10578	-2.21	4.82e-05	0.00497
SCGB3A2	117156	4.09	4.89e-05	0.005
NCR1	9437	-2.51	5.05e-05	0.00514
LAG3	3902	-1.56	5.08e-05	0.00515
NCF4	4689	-1.71	5.27e-05	0.00531
CSF3R	1441	-2.29	5.36e-05	0.00538
NAV2	89797	1.63	5.42e-05	0.00542
LST1	7940	-1.88	5.57e-05	0.0055
ZDHHC11B	653082	2.1	5.58e-05	0.0055
IGFBPL1	347252	2.93	5.74e-05	0.00561
C1QC	714	-1.78	5.9e-05	0.00565
CD300C	10871	-1.82	5.9e-05	0.00565
GMFG	9535	-1.86	5.87e-05	0.00565
LINGO1	84894	2.17	5.82e-05	0.00565
PENK	5179	3.71	5.88e-05	0.00565
SLC24A2	25769	2.67	6.27e-05	0.00598
CTAGE15	441294	2.3	6.37e-05	0.00599
RIMS2	9699	2.92	6.39e-05	0.00599
SLA	6503	-1.81	6.34e-05	0.00599
TRBV4-1	28617	-2.12	6.44e-05	0.00601
SAMD3	154075	-1.79	6.5e-05	0.00604
SMAD6	4091	1.45	6.66e-05	0.00617
SAMSN1	64092	-2.01	6.71e-05	0.00619
FAM111B	374393	1.53	6.84e-05	0.00626
FGR	2268	-2.1	6.84e-05	0.00626
CD247	919	-1.95	6.98e-05	0.00637
HOXC4	3221	1.98	7.04e-05	0.00639
MS4A15	219995	3.99	7.13e-05	0.00645
CD48	962	-1.92	7.56e-05	0.00679
CYTIP	9595	-1.85	7.6e-05	0.00679
DACH1	1602	2.34	7.59e-05	0.00679
ASGR2	433	-2.33	7.72e-05	0.00687
GLIPR1	11010	-1.27	7.89e-05	0.00697
IFI30	10437	-1.59	7.89e-05	0.00697
CD2	914	-1.75	8.09e-05	0.00704
SH2D1A	4068	-1.85	8.09e-05	0.00704
CD86	942	-1.65	8.82e-05	0.00756
CFD	1675	-1.48	8.8e-05	0.00756
AQP9	366	-2.38	8.93e-05	0.00756
CADPS	8618	2.65	8.88e-05	0.00756
B4GALNT3	283358	1.35	9.01e-05	0.00757
FCER1G	2207	-1.84	8.99e-05	0.00757
GALNT9	50614	2.91	9.33e-05	0.00779
NINJ1	4814	-1.58	9.37e-05	0.00779
ZFYVE28	57732	-1.04	9.36e-05	0.00779
ESPNP	284729	3	9.45e-05	0.00783
WNT11	7481	2.5	9.54e-05	0.00787
B2M	567	-1.32	9.66e-05	0.00795
PPP1R1B	84152	3.2	0.0001	0.00816
HIF3A	64344	2.53	0.000104	0.00837
HLA-DRB6	3128	-2.04	0.000104	0.00837
KCNAB2	8514	-1.24	0.000104	0.00837
PCOLCE2	26577	-2.28	0.000104	0.00837
CSGALNACT2	55454	-1.01	0.000106	0.00839
PLEK	5341	-2.01	0.000106	0.00839
STX11	8676	-1.66	0.000106	0.00839
PIEZO2	63895	2.07	0.00011	0.00867
APOBEC3G	60489	-1.36	0.000111	0.0087
HAS1	3036	2.79	0.000112	0.00872
LGI3	203190	3.14	0.000112	0.00872
SNORD116-14	100033426	5.75	0.000113	0.00873
ADCY1	107	1.57	0.000115	0.00884
AGTR2	186	3.78	0.000115	0.00884
KCNB2	9312	3.08	0.000116	0.00884
CD72	971	-1.52	0.000117	0.00889
HAP1	9001	2.36	0.00012	0.00908
HPGDS	27306	-1.63	0.000122	0.00918
IL4I1	259307	-1.99	0.000122	0.00918
ZBP1	81030	-1.7	0.000125	0.00936
GPSM3	63940	-1.6	0.000127	0.00946
PLOD2	5352	-1.46	0.000127	0.00946
DKK1	22943	2.9	0.000129	0.00951
RN7SK	125050	1.39	0.000133	0.00968
SAMD5	389432	2.03	0.000132	0.00968
MMP8	4317	-2.38	0.000133	0.0097
PGLYRP1	8993	-2.98	0.000135	0.00978
C3AR1	719	-1.72	0.000138	0.00994
